# Supplementary material
Source: PubMed Central journal article supplement (PMC6081269)
Supplement: NIHMS941136-supplement-1.pdf [file NIHMS941136-supplement-1.pdf]

**Supplementary Table 1**

| <b>Patient and Control Characteristics</b> | No. of controls (%)<br>N = 13 | No. of Patients (%)<br>N = 21 |
|--------------------------------------------|-------------------------------|-------------------------------|
| <b>Age</b>                                 |                               |                               |
| Median                                     | 59                            | 57                            |
| Range                                      | 41-86                         | 30-76                         |
| <b>Sex</b>                                 |                               |                               |
| Female                                     | 6 (46)                        | 7 (33)                        |
| Male                                       | 7 (54)                        | 14 (67)                       |

**Supplementary Figure 1**
