# Supplementary material
Source: PubMed Central journal article supplement (PMC6081269)
Supplement: NIHMS941136-supplement-2.pdf [file NIHMS941136-supplement-2.pdf]

## Supplementary Figure 1

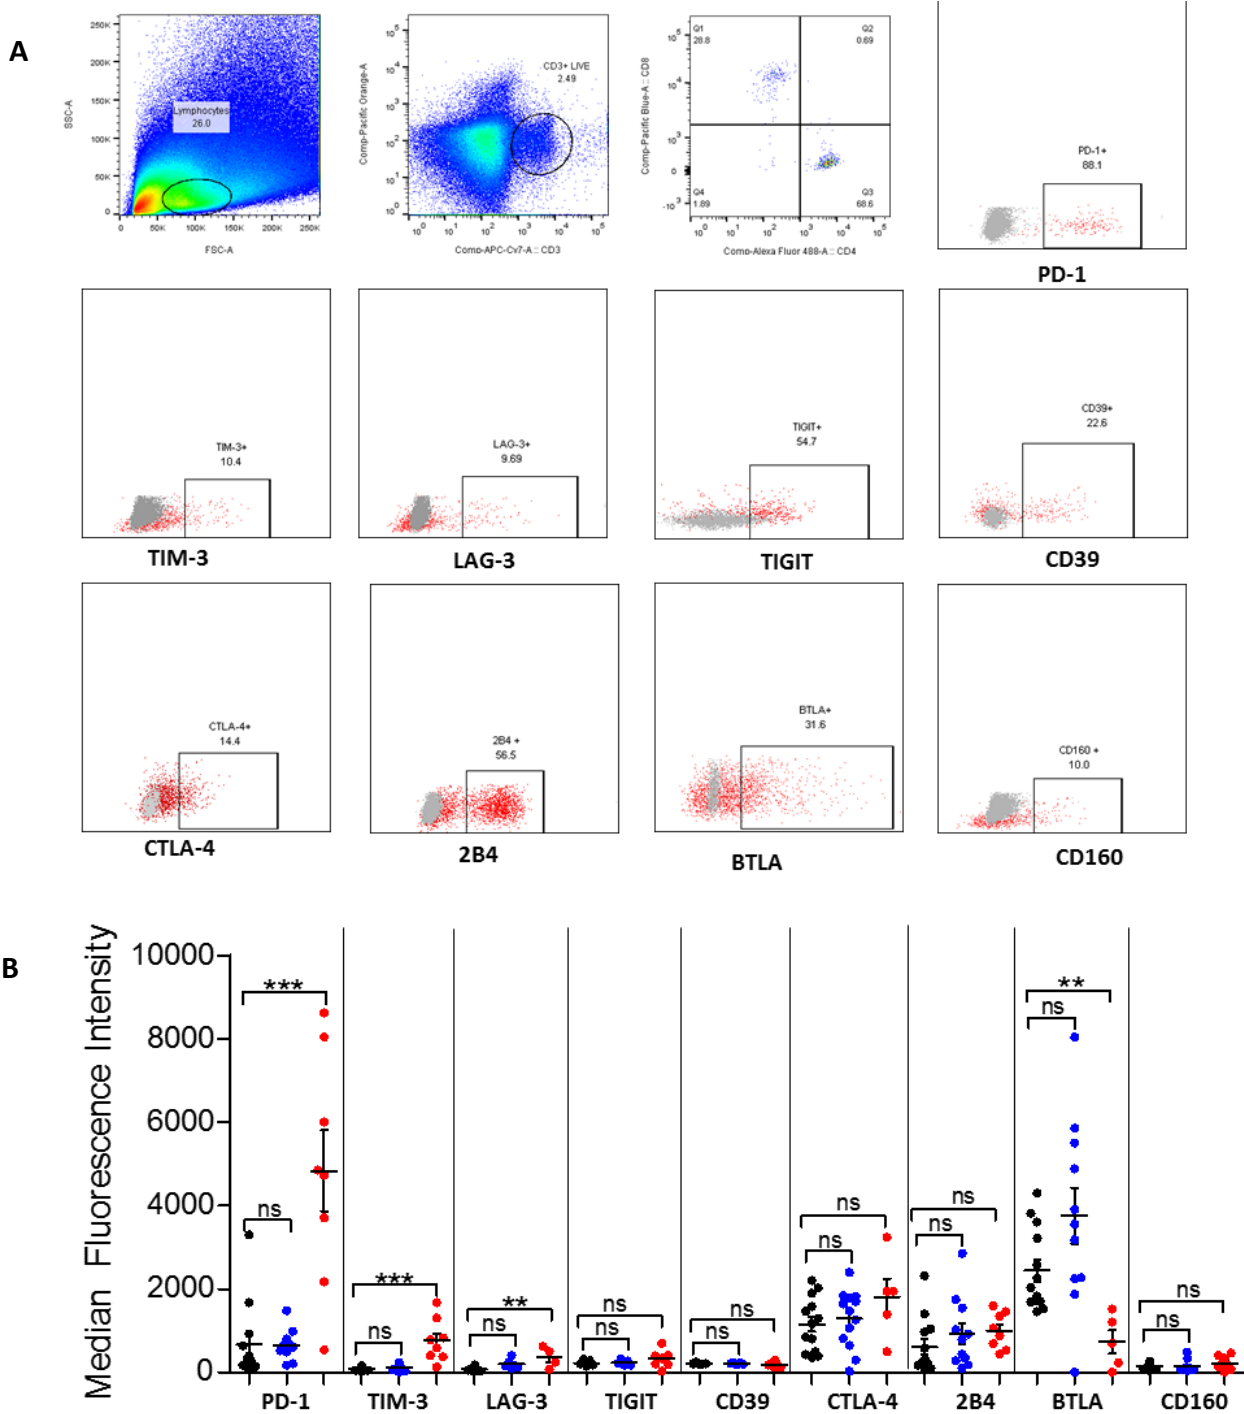

**Supplementary Figure 1: Gating strategy for tumor infiltrating lymphocytes.** A. Representative dot plots of patient TIL (red) and isotype control (gray) are shown for each immune checkpoint. B. Median fluorescent intensity of immune checkpoints in human TIL (red), patient blood (blue), or control blood (black). Significance was assessed via unpaired t-test between patient and control samples. \* $p < 0.05$ ; \*\* $p < 0.01$ ; \*\*\* $p < 0.0001$  throughout figure.
