# Supplementary material
Source: PubMed Central journal article supplement (PMC6081269)
Supplement: NIHMS941136-supplement-3.pdf [file NIHMS941136-supplement-3.pdf]

## Supplementary Figure 2

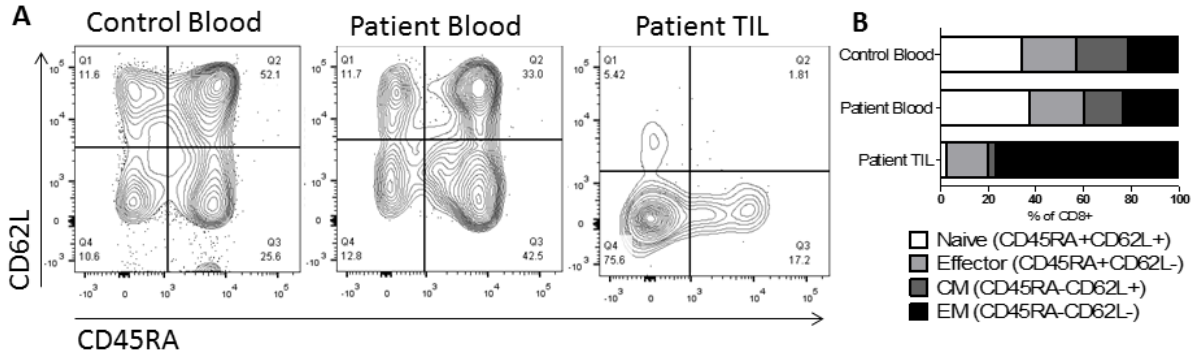

**Supplementary Figure 2: Memory phenotype of human GBM TIL** A. Representative contour plots of CD8<sup>+</sup> T cells obtained from control blood, patient blood, and patient TIL. B. average % of CD8<sup>+</sup> T cells demonstrating naïve, effector, central memory (CM), or effector memory (EM) phenotype across all control (n=10) or patient (n=11) samples.
