# Supplementary material
Source: PubMed Central journal article supplement (PMC6081269)
Supplement: NIHMS941136-supplement-4.pdf [file NIHMS941136-supplement-4.pdf]

### Supplementary Figure 3

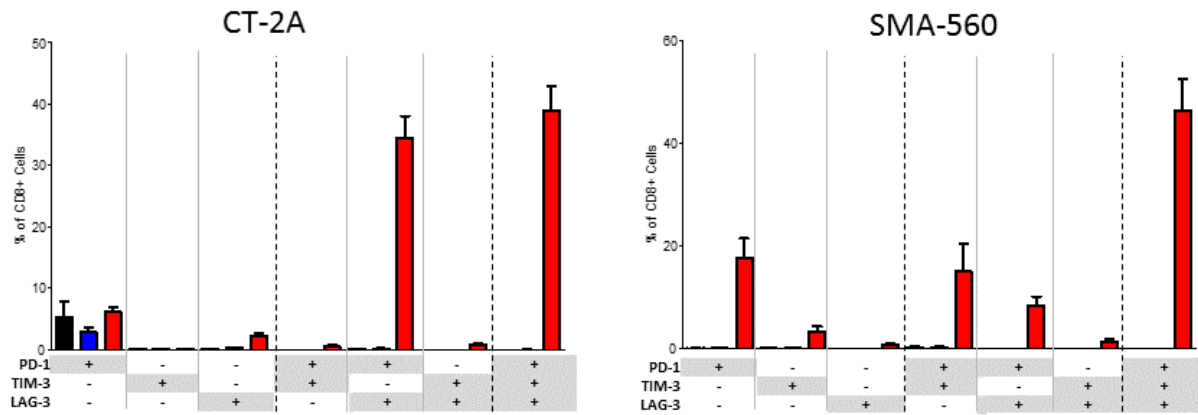

**Supplementary Figure 3: Co-expression of immune checkpoints in murine glioma.** Boolean gating was performed on CD8<sup>+</sup> T cells isolated from murine CT2A (n=5) or SMA-560 (n=5) tumors (red), as well as matched tumor-bearing blood (blue) and naïve blood (black) (n=5) to determine co-expression of PD-1, Tim-3, and Lag-3. Bars represent means +/- SEM. \*p<0.05; \*\*p<0.01; \*\*\*p<0.0001 by one-way ANOVA followed by Tukey's post-hoc test.
