# Supplementary material
Source: PubMed Central journal article supplement (PMC6081269)
Supplement: NIHMS941136-supplement-6.pdf [file NIHMS941136-supplement-6.pdf]

## Supplementary Figure 5

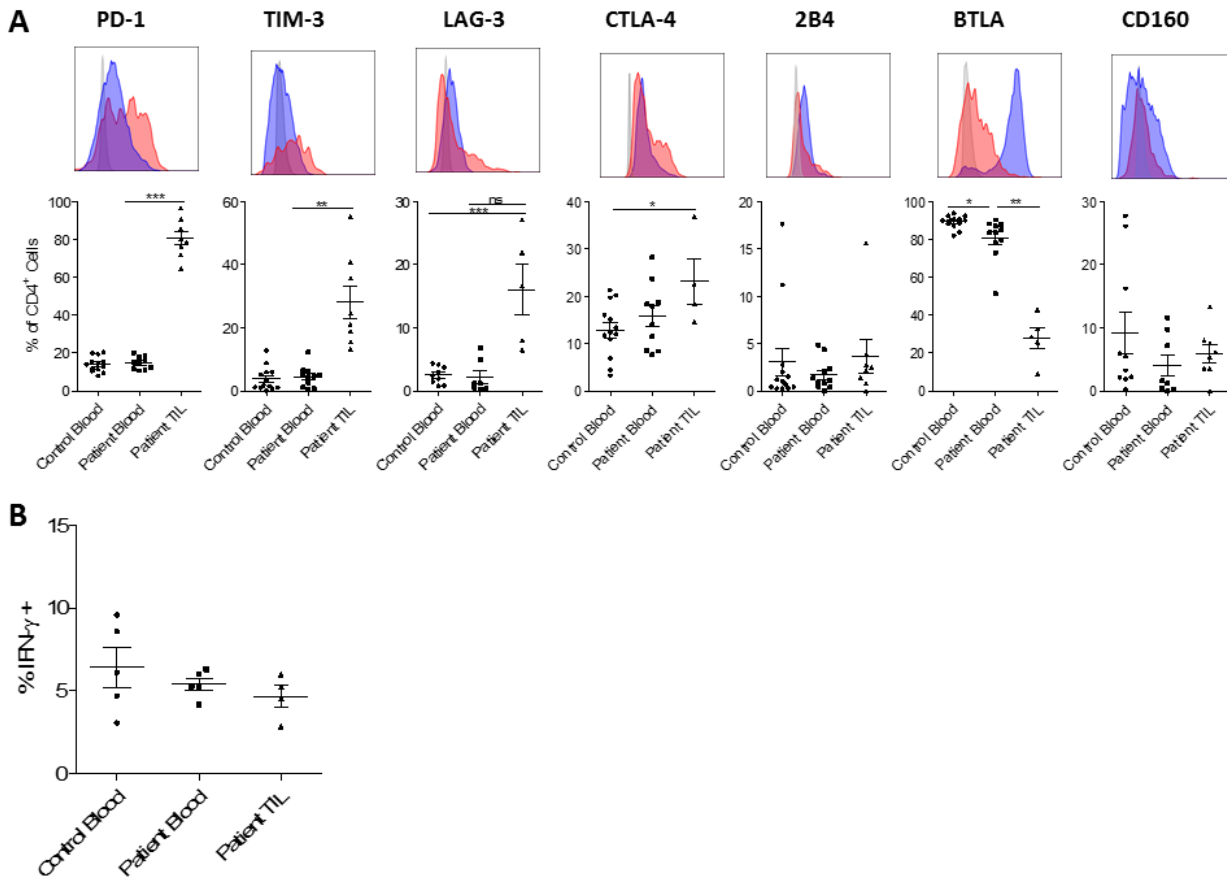

### Supplementary Figure 5: Immune checkpoint and cytokine expression on human GBM CD4<sup>+</sup> TIL: A.

Representative histograms of immune checkpoints expressed on CD4<sup>+</sup> T cells isolated from human GBM TIL (red), patient blood (blue), and isotype control (gray) are shown. Graphs show frequency of checkpoint molecule expression on CD4<sup>+</sup> T cells isolated from TIL (PD-1, TIM-3 n=20; LAG-3 n=18; CTLA-4 n=13; CD39, TIGIT n=12; CD160, 2B4 n=8; BTLA n=5), patient blood (PD-1, TIM-3 n=16; CTLA-4 n=15; 2B4, BTLA n=11; LAG-3 n=12; CD160 n=9; TIGIT, CD39 n=5), or control blood (PD-1, TIM-3, CTLA-4 n=14; LAG-3 n=10; 2B4, BTLA n=13; CD160 n=10; TIGIT, CD39 n=5). \*p<0.05; \*\*p<0.01; \*\*\*p<0.0001 by unpaired t-test between patient and control samples. B. Post-stimulation levels of IFN- $\gamma$  are shown across sample types. Difference assessed via one-way ANOVA.
