# Supplementary material
Source: PubMed Central journal article supplement (PMC6081269)
Supplement: NIHMS941136-supplement-7.pdf [file NIHMS941136-supplement-7.pdf]

## Supplementary Figure 6

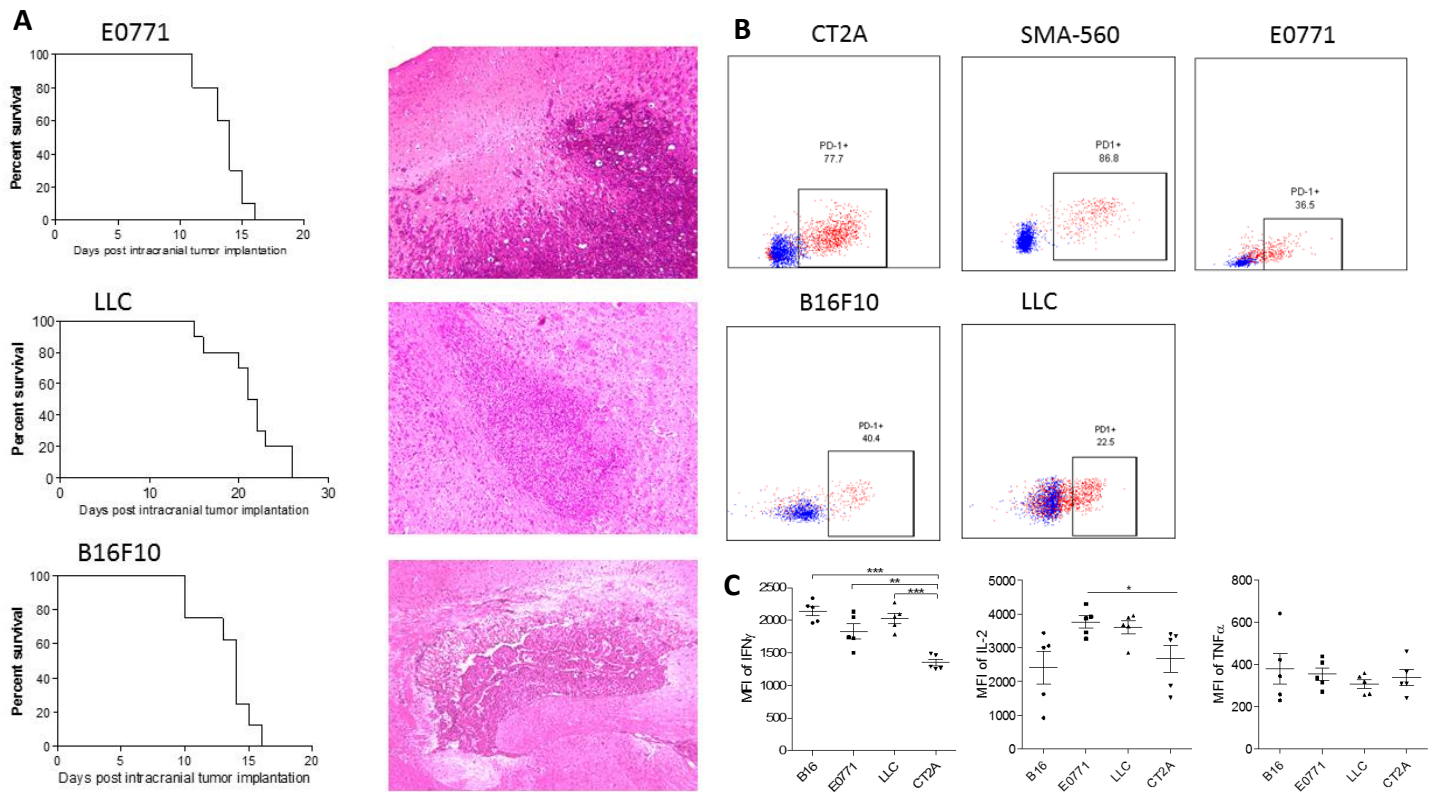

**Supplementary Figure 6: T cell exhaustion in brain metastases models.** A. Survival curves of breast (E0771) implanted IC with 10,000 cells (n=10); lung (LLC) implanted IC with 10,000 cells (n=10); and melanoma (B16F10) implanted IC with 500 cells (n=8). Representative H&E images demonstrate tumor infiltration into the brain. B. Representative dot plots of PD-1 expression on CD8<sup>+</sup> T cells showing TIL (red) and blood (blue) across all tumor models. C. The MFI of IFN- $\gamma$ , IL-2, and TNF- $\alpha$  of CD8<sup>+</sup> TIL from tumor models. Differences assessed using one-way ANOVA followed by Tukey's post-hoc test.
