# Supplementary material
Source: PubMed Central journal article supplement (PMC6081269)
Supplement: NIHMS941136-supplement-8.pdf [file NIHMS941136-supplement-8.pdf]

Supplementary Figure 7

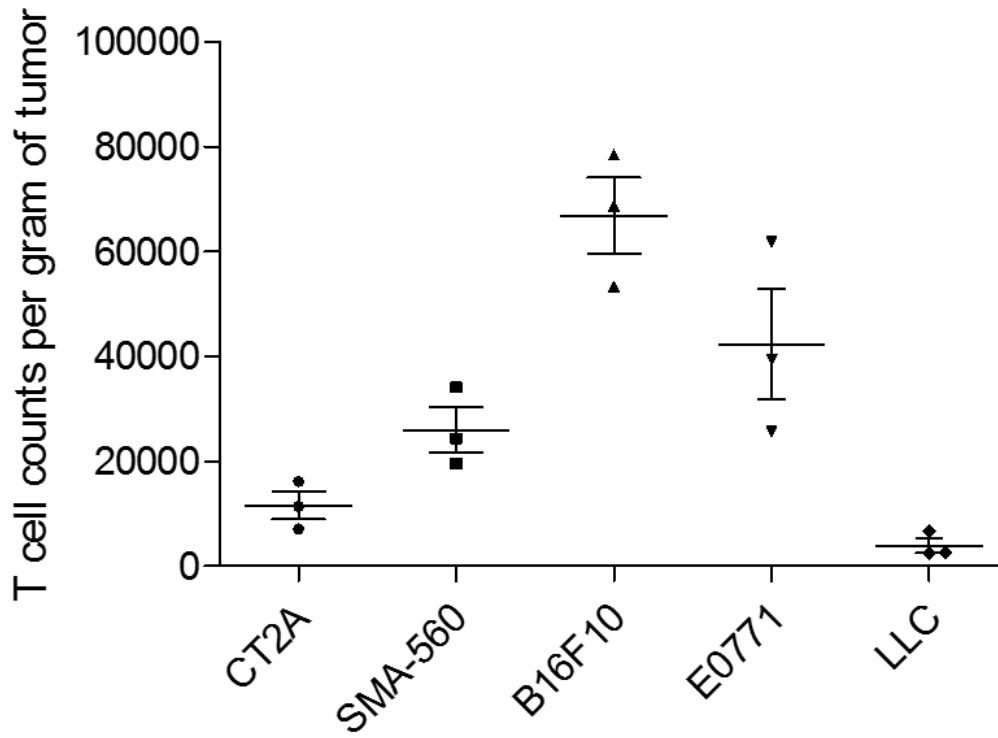

**Supplementary Figure 7: T cell counts per gram of tumor across tumor models.** Tumors were harvested from all tumor-bearing mice when mice were moribund (n=3 per tumor model). Tumors were weighed, TIL were isolated, stained with CD3+ antibody, and flow cytometry beads were aliquoted into each sample. T cells/gram tumor were calculated.
